# Supplementary material for: County-Level Life Expectancy Change: A Novel Metric for Monitoring Public Health
Source: MDPI journal article supplement (doi:10.3390/ijerph191710672), 2022-08-27
Supplement: s1 [file s1]

**Supplemental Table S1: County Health Rankings Indicator Definitions**

| County Health Rankings Indicator      | Definition                                                                                  |
|---------------------------------------|---------------------------------------------------------------------------------------------|
| Premature Death                       | Years of potential life lost before age 75 (YPLL-75) rate                                   |
| Poor or Fair Health                   | Percent of adults reporting fair or poor health                                             |
| Poor Physical Health Days             | Mean physically unhealthy days/month for adult                                              |
| Poor Mental Health Days               | Mean mentally unhealthy days/month for adults                                               |
| Low Birthweight                       | Percent of live births with low birthweight (< 2500 grams)                                  |
| Adult Smoking                         | Percent of adults that report smoking at least 100 cigarettes and that they currently smoke |
| Adult Obesity                         | Percent of adults that report a BMI $\geq 30$                                               |
| Binge Drinking                        | Percent of adults that report binge drinking in the past 30 days                            |
| Motor Vehicle Crash Death Rate        | MV deaths per 100K population (crude rate)                                                  |
| Chlamydia Rate                        | Chlamydia rate per 100K population                                                          |
| Teen Birth Rate                       | Teen birth rate per 1,000 female population, ages 15–19                                     |
| Uninsured Adults                      | Percent of population < age 65 without health insurance                                     |
| Unemployment                          | Percent of population age 16+ unemployed but seeking work                                   |
| Children in Poverty                   | Percent of children in poverty                                                              |
| Income Inequality                     | Gini coefficient of income inequality                                                       |
| Inadequate Social Support             | Percent of adults without social/emotional support                                          |
| Single Parent Households              | Percent of all households that are single-parent households                                 |
| Violent Crime Rate                    | Violent crime rate per 100K population                                                      |
| Homicide Rate                         | Homicide death rate per 100K population (age-adjusted)                                      |
| Air Pollution Particulate Matter Days | Annual number of unhealthy air quality days due to fine particulate matter                  |
| Air Pollution Ozone Days              | Annual number of unhealthy air quality days due to ozone                                    |
| Liquor Store Density                  | Number of liquor stores per 10K population                                                  |
| Primary Care Provider Rate            | Primary care provider rate per 100K                                                         |
| Preventable Hospital Stays            | Hospitalization rate for ambulatory-care sensitive conditions per 1,000 Medicare enrollees  |
| Diabetic Screening                    | Percent of diabetic Medicare enrollees that receive HbA1c screening                         |
| Hospice Use                           | Percent of chronically ill Medicare enrollees in hospice care in last 6 months of life      |
| High School Graduation                | Averaged freshman graduation rate (Percent of ninth grade cohort that graduates in 4 years) |
| College Degrees                       | Percent of population age 25+ with 4-year college degree or higher                          |
| Access to Healthy Foods               | Percent of zip codes in county with healthy food outlets                                    |

**Supplemental Table S2: Associations between Modifiable Determinants of Health in 2010 and Life Expectancy Change in 2011 - 2016**

| County Health Rankings Indicator      | Odds of being an Increasing LE county compared to No Change |                       | Odds of being a Decreasing LE county compared to No Change |                       |
|---------------------------------------|-------------------------------------------------------------|-----------------------|------------------------------------------------------------|-----------------------|
|                                       | Odds Ratio                                                  | 95% CI                | Odds Ratio                                                 | 95% CI                |
| Premature Death                       | <b>1.000</b>                                                | <b>[1.000, 1.000]</b> | 1.000                                                      | [1.000, 1.000]        |
| Poor or Fair Health                   | <b>0.966</b>                                                | <b>[0.947, 0.984]</b> | 1.016                                                      | [1.000, 1.032]        |
| Poor Physical Health Days             | <b>0.825</b>                                                | <b>[0.746, 0.913]</b> | <b>1.102</b>                                               | <b>[1.018, 1.193]</b> |
| Poor Mental Health Days               | <b>0.854</b>                                                | <b>[0.768, 0.949]</b> | 1.040                                                      | [0.954, 1.133]        |
| Low Birthweight                       | <b>0.909</b>                                                | <b>[0.858, 0.962]</b> | 1.004                                                      | [0.957, 1.054]        |
| Adult Smoking                         | <b>0.956</b>                                                | <b>[0.937, 0.975]</b> | <b>1.019</b>                                               | <b>[1.002, 1.037]</b> |
| Adult Obesity                         | <b>0.923</b>                                                | <b>[0.898, 0.95]</b>  | <b>1.029</b>                                               | <b>[1.003, 1.056]</b> |
| Binge Drinking                        | 1.014                                                       | [0.993, 1.036]        | 0.992                                                      | [0.974, 1.01]         |
| Motor Vehicle Crash Death Rate        | 0.995                                                       | [0.984, 1.005]        | <b>1.010</b>                                               | <b>[1.001, 1.019]</b> |
| Chlamydia Rate                        | <b>0.999</b>                                                | <b>[0.999, 1.000]</b> | 1.000                                                      | [1.000, 1.000]        |
| Teen Birth Rate                       | <b>0.991</b>                                                | <b>[0.986, 0.996]</b> | 1.003                                                      | [0.999, 1.008]        |
| Uninsured Adults                      | <b>1.050</b>                                                | <b>[1.031, 1.07]</b>  | 0.987                                                      | [0.971, 1.004]        |
| Unemployment                          | <b>0.879</b>                                                | <b>[0.834, 0.927]</b> | <b>1.050</b>                                               | <b>[1.009, 1.094]</b> |
| Children in Poverty                   | <b>0.981</b>                                                | <b>[0.969, 0.993]</b> | <b>1.018</b>                                               | <b>[1.008, 1.029]</b> |
| Income Inequality                     | 1.002                                                       | [0.974, 1.03]         | 0.991                                                      | [0.967, 1.016]        |
| Inadequate Social Support             | 0.984                                                       | [0.962, 1.008]        | 1.008                                                      | [0.988, 1.028]        |
| Single Parent Households              | <b>0.925</b>                                                | <b>[0.887, 0.965]</b> | <b>1.044</b>                                               | <b>[1.008, 1.081]</b> |
| Violent Crime Rate                    | <b>0.999</b>                                                | <b>[0.998, 0.999]</b> | 1.000                                                      | [0.999, 1.000]        |
| Homicide Rate                         | 0.970                                                       | [0.936, 1.005]        | 1.020                                                      | [0.992, 1.048]        |
| Air Pollution Particulate Matter Days | 0.981                                                       | [0.958, 1.005]        | 0.984                                                      | [0.963, 1.004]        |
| Air Pollution Ozone Days              | 0.990                                                       | [0.975, 1.005]        | <b>0.976</b>                                               | <b>[0.961, 0.991]</b> |
| Liquor Store Density                  | 1.070                                                       | [0.979, 1.17]         | 1.013                                                      | [0.936, 1.097]        |
| Primary Care Provider Rate            | <b>1.003</b>                                                | <b>[1.000, 1.005]</b> | <b>0.997</b>                                               | <b>[0.995, 0.999]</b> |
| Preventable Hospital Stays            | 0.998                                                       | [0.995, 1.001]        | <b>1.003</b>                                               | <b>[1.000, 1.005]</b> |
| Diabetic Screening                    | 0.997                                                       | [0.983, 1.01]         | 0.995                                                      | [0.983, 1.007]        |
| Hospice Use                           | 1.003                                                       | [0.992, 1.013]        | <b>0.988</b>                                               | <b>[0.979, 0.997]</b> |
| High School Graduation                | <b>1.009</b>                                                | <b>[1.000, 1.017]</b> | 1.001                                                      | [0.994, 1.008]        |
| College Degrees                       | <b>1.038</b>                                                | <b>[1.025, 1.051]</b> | <b>0.970</b>                                               | <b>[0.958, 0.983]</b> |
| Access to Healthy Foods               | 1.000                                                       | [0.995, 1.005]        | <b>0.992</b>                                               | <b>[0.988, 0.997]</b> |

*Increasing LE: Counties with an annual change in LE slope of  $\geq 0.1$  years; Decreasing LE: Counties with an annual change in LE slope of  $\leq 0.1$  years.*

*Bolded values indicate statistical significance at  $p < 0.05$*
